# Supplementary material for: Mimicking a gecko’s foot with strong adhesive strength based on a spinnable vertically aligned carbon nanotube array
Source: Royal Society of Chemistry journal article supplement (doi:10.1039/c3ra46113k), 2013-12-05
Supplement: c3ra46113k.pdf [file c3ra46113k.pdf]

# **Mimicking Gecko Foot with Strong Adhesive Strength Based on Spinnable Vertically Aligned Carbon Nanotube Arrays**

Yanbin Cui, Yang Ju\*, Baiyao Xu, Peng Wang, Naoki Kojima, Kazuma Ichioka and  
Atsushi Hosoi

*Department of Mechanical Science and Engineering, Nagoya University, Nagoya  
464-8603, Japan*

E-mail: [ju@mech.nagoya-u.ac.jp](mailto:ju@mech.nagoya-u.ac.jp)

## **Supporting Information**

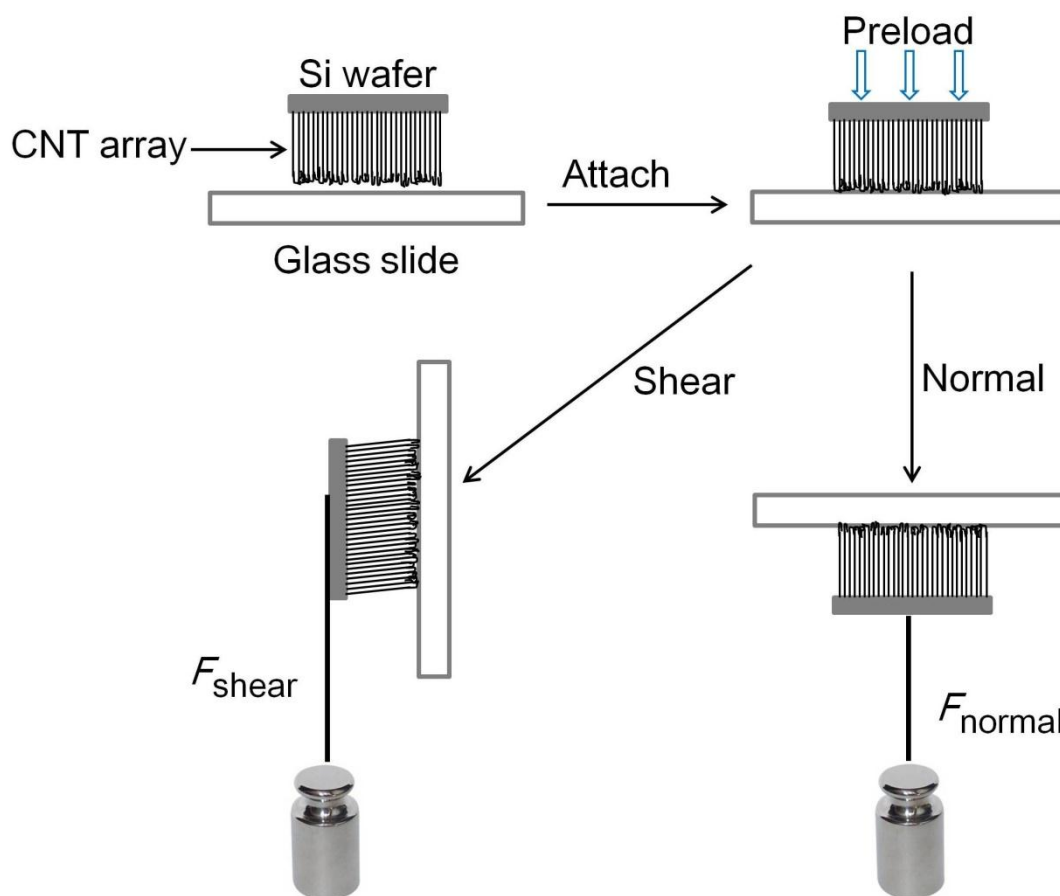

**Figure S1.** Schematic images of the adhesion measurements of spinnable VACNT array adhesives.

For the adhesion test, a preload force was first applied to attach spinnable VACNT array to glass slide. The preload force was then removed to measure the shear and normal adhesion strengths of spinnable VACNT array adhesives.

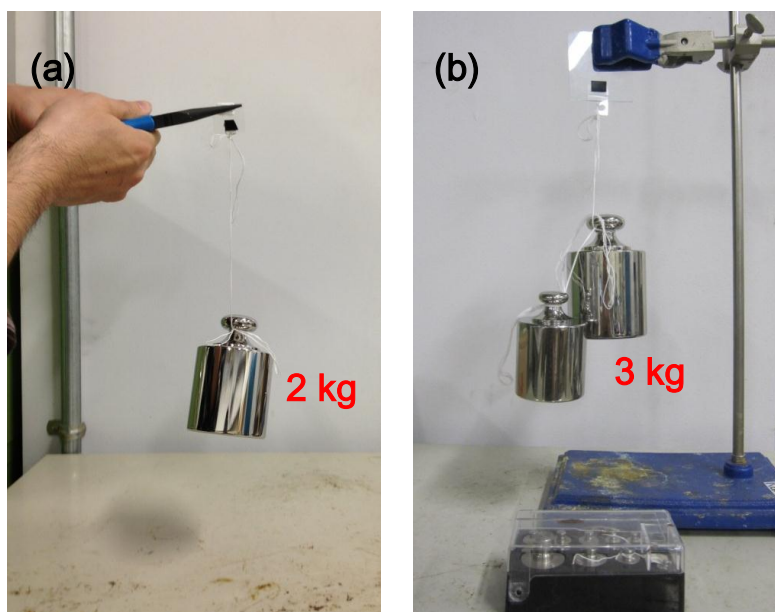

**Figure S2.** (a) A weight of 2 kg suspended from a glass slide with used of a VACNT array adhesive with a contact area of  $0.64 \text{ cm}^2$ . (b) Photo shows a weight of 3 kg sustained from a glass slide by a CNT array adhesive with a contact area of  $0.96 \text{ cm}^2$ . The preload pressure used to attach the adhesive was  $122.5 \text{ N/cm}^2$ .
